# Supplementary material for: Climate change-related disturbances in 2024 drive the largest known population of elkhorn coral (Acropora palmata) in Barbados to the brink of extirpation
Source: Research Square preprint supplement (doi:10.21203/rs.3.rs-8750412/v1), 2026-02-13
Supplement: Supplementary file 1 [file 586112c2f182f310dcf73d50.xlsx]

## Sheet: Colony characteristics
Colony ID	Length (cm)	Width (cm)	Height (cm)	Depth (m)	Category
34	86.6	77.2	28	2.1	Initial colonies lost to Beryl
43	123.4	110.5	55	2.1	Initial colonies lost to Beryl
51	62.6	50.8	4	1.1	Initial colonies lost to Beryl
52	62.6	50.8	31	1.1	Initial colonies lost to Beryl
53	74.6	67	31	1.1	Initial colonies lost to Beryl
54	40.9	30.4	26	1.1	Initial colonies lost to Beryl
56	57.1	43.6	36	1.1	Initial colonies lost to Beryl
57	41.1	33.7	15	1.1	Initial colonies lost to Beryl
58	93.1	72.5	4	1.1	Initial colonies lost to Beryl
59	90.6	82.8	38	1.1	Initial colonies lost to Beryl
60	97.3	81.3	30	1.2	Initial colonies lost to Beryl
Red	117.9	97.1	NA	1.1	Initial colonies lost to Beryl
61	73.6	72.8	23	2.1	Additional colonies that survived Beryl
62	97.6	60.3	23	2	Additional colonies that survived Beryl
63	120	91.4	31	1.7	Additional colonies that survived Beryl
64	85.9	67.1	37	1.7	Additional colonies that survived Beryl
65	85.5	45.5	32	2.1	Additional colonies that survived Beryl
66	120.6	118	52	2.3	Additional colonies that survived Beryl
67	63.8	55.5	42	2.1	Additional colonies that survived Beryl
68	99.2	94	48	2.3	Additional colonies that survived Beryl
69	60.3	59.9	43	1.9	Additional colonies that survived Beryl
70	150.2	93.6	43	1.9	Additional colonies that survived Beryl
71	67.9	50.2	21	1.6	Additional colonies that survived Beryl
72	65.6	49.6	25	1.6	Additional colonies that survived Beryl
73	108.6	89	27	1.7	Additional colonies that survived Beryl
74	74.6	74.5	50	2	Additional colonies that survived Beryl
75	52.1	39.2	36	1.6	Additional colonies that survived Beryl
76	49.1	46.3	20	2	Additional colonies that survived Beryl
77	137.4	111.7	63	2	Additional colonies that survived Beryl
78	37.8	32.9	25	2	Additional colonies that survived Beryl
79	30	26.2	16	2.1	Additional colonies that survived Beryl
80	51.3	37	20	1.5	Additional colonies that survived Beryl
31	114	101.9	38	2.4	Initial colonies that survived Beryl
32	325.6	163.6	120	2.5	Initial colonies that survived Beryl
33	60.3	46.6	29	2.1	Initial colonies that survived Beryl
35	67.1	52.5	35	2.3	Initial colonies that survived Beryl
36	50.4	47.4	17	2.1	Initial colonies that survived Beryl
37	46.6	43.6	19	2.4	Initial colonies that survived Beryl
38	195.6	152.3	100	2.4	Initial colonies that survived Beryl
39	53.1	28.9	20	2.3	Initial colonies that survived Beryl
40	59	49.6	23	2	Initial colonies that survived Beryl
41	73.7	67.6	28	2	Initial colonies that survived Beryl
42	88.9	61.4	28	2.1	Initial colonies that survived Beryl
44	58.6	51.6	39	2.1	Initial colonies that survived Beryl
45	91.1	71.3	41	2.1	Initial colonies that survived Beryl
46	118.5	93.3	25	1.9	Initial colonies that survived Beryl
47	80.6	72	28	2	Initial colonies that survived Beryl
48	43.6	42.4	21	1.9	Initial colonies that survived Beryl
49	60.5	34.8	30	2	Initial colonies that survived Beryl
50	68.8	33.5	26	2.2	Initial colonies that survived Beryl
55	108.7	97.5	35	1.1	Initial colonies that survived Beryl
Green	138.1	124.5	40	2.3	Initial colonies that survived Beryl
White	108.2	85.7	47	2.1	Initial colonies that survived Beryl

## Sheet: Health, mortality, and SST 
Colony health status							Dead surface area per colony						Sea surface temperature (SST) (degrees Celsius)
Date	Total number of colonies monitored	Number of fully pigmented colonies	Number of bleached colonies	Number of dead colonies	Number of dislodged colonies		Date	Average	Standard deviation	Standard error	number of colonies		Date	Number of days	NOAA Windward island SST Minimum daily average	NOAA Windward island SST Maximum daily average	In situ SST daily average
2024-07-08	21	21	0	0	0		2024-07-08	1.39	2.29	0.5	21		2024-07-08	14	28.78	29.4	29.32
2024-07-23	41	41	0	0	0		2024-07-23	1.78	2.57	0.4	41		2024-07-23	15	28.98	29.53	29.59
2024-08-06	40	40	0	0	0		2024-08-06	1.72	1.98	0.31	40		2024-08-06	14	29.3	29.85	29.7
2024-08-19	39	39	0	0	0		2024-08-19	1.96	2.25	0.36	39		2024-08-19	13	29.37	30.04	29.94
2024-09-02	40	40	0	0	0		2024-09-02	1.41	1.76	0.28	40		2024-09-02	14	29.72	30.48	30.19
2024-09-16	41	34	7	0	0		2024-09-16	1.66	2.05	0.32	41		2024-09-16	14	30	30.78	30.61
2024-10-01	39	0	39	0	0		2024-10-01	1.69	1.63	0.26	39		2024-10-01	15	30.14	30.9	30.69
2024-10-15	40	0	40	0	0		2024-10-15	1.54	1.9	0.3	40		2024-10-15	14	30.28	30.92	30.8
2024-10-29	40	0	40	0	0		2024-10-29	11.53	20.71	3.27	40		2024-10-29	14	29.97	30.41	30.26
2024-11-12	41	0	35	6	0		2024-11-12	32.59	39.49	6.17	41		2024-11-12	14	29.73	30.26	30.1
2024-12-04	40	0	21	15	4		2024-12-04	78.84	29.03	4.84	36		2024-12-04	22	29.16	29.78	29.52
2024-12-18	40	0	8	28	4		2024-12-18	95.09	18.66	3.11	36		2024-12-18	14	28.54	29.06	28.87
2025-01-03	41	0	5	32	4		2025-01-03	97.57	9.78	1.61	37		2025-01-03	16	28.13	28.59	28.55
2025-01-31	41	1	1	35	4		2025-01-31	98.3	7.55	1.24	37		2025-01-31	26	27.67	28.1	28.06
2025-02-14	41	1	0	36	4		2025-02-14	98.9	6.7	1.1	37		2025-02-14	14	27.16	27.69	27.68
2025-03-12	41	1	0	36	4		2025-03-12	98.9	6.7	1.1	37		2025-03-12	26	26.84	27.36	27.3
